# Supplementary material
Source: PubMed Central journal article supplement (PMC7960333)
Supplement: 15-00897.pdf [file 15-00897.pdf]

**On-line Table 1: Mean, SD, and CI for SI measurements**

| Gestational Age wk | US 2D |             |             | US 3D |             |             | MRI |             |             |
|--------------------|-------|-------------|-------------|-------|-------------|-------------|-----|-------------|-------------|
|                    | No.   | Mean ± SD   | 95% CI      | No.   | Mean ± SD   | 95% CI      | No. | Mean ± SD   | 95% CI      |
| 21                 | 4     | 11.8 ± 0.94 | 10.30–13.28 | 15    | 12.7 ± 1.04 | 12.16–13.31 |     |             |             |
| 22                 | 10    | 12.5 ± 1.27 | 11.55–13.37 | 10    | 13.6 ± 1.01 | 12.86–14.30 |     |             |             |
| 23                 | 8     | 12.8 ± 0.66 | 12.29–13.38 | 9     | 14.4 ± 1.28 | 13.45–15.42 |     |             |             |
| 24                 | 4     | 13.9 ± 0.65 | 12.91–14.96 | 8     | 15.2 ± 1.48 | 13.97–16.45 |     |             |             |
| 25                 | 16    | 15.2 ± 0.96 | 14.67–15.69 | 9     | 16.0 ± 1.10 | 15.12–16.81 |     |             |             |
| 26                 | 13    | 16.1 ± 1.23 | 15.38–16.86 | 11    | 17.0 ± 1.36 | 16.03–17.86 |     |             |             |
| 27                 | 16    | 16.9 ± 1.27 | 16.23–17.58 | 12    | 18.6 ± 1.07 | 17.96–19.31 | 5   | 14.1 ± 0.65 | 13.31–14.93 |
| 28                 | 18    | 17.4 ± 0.94 | 16.92–17.85 | 11    | 19.2 ± 2.01 | 17.85–20.55 | 10  | 14.7 ± 0.63 | 14.22–15.12 |
| 29                 | 12    | 18.7 ± 1.03 | 18.02–19.34 | 11    | 20.1 ± 1.15 | 19.36–20.91 | 13  | 15.9 ± 1.32 | 15.15–16.74 |
| 30                 | 21    | 18.7 ± 0.71 | 18.39–19.04 | 11    | 21.0 ± 1.65 | 19.93–22.15 | 16  | 17.7 ± 1.21 | 17.06–18.35 |
| 31                 | 22    | 19.4 ± 1.10 | 18.89–19.87 | 23    | 20.8 ± 1.84 | 19.96–21.55 | 26  | 17.9 ± 0.98 | 17.51–18.30 |
| 32                 | 12    | 19.3 ± 0.83 | 18.81–19.87 | 15    | 22.2 ± 2.26 | 20.89–23.40 | 27  | 18.6 ± 1.27 | 18.05–19.05 |
| 33                 | 14    | 20.6 ± 1.72 | 19.61–21.60 | 8     | 22.8 ± 1.23 | 21.69–23.97 | 16  | 19.6 ± 0.88 | 19.11–20.06 |
| 34                 | 10    | 20.6 ± 1.25 | 19.73–21.51 | 11    | 23.3 ± 2.74 | 21.43–25.11 | 15  | 19.4 ± 0.92 | 18.92–19.93 |
| 35                 | 13    | 21.6 ± 1.19 | 20.90–22.33 | 8     | 23.2 ± 2.42 | 21.18–25.22 | 23  | 20.2 ± 1.56 | 19.52–20.86 |

**On-line Table 2: Mean, SD, and CI for AP measurements**

| Gestational Age (wk) | US 2D |             |             | US 3D |             |             | MRI |             |             |
|----------------------|-------|-------------|-------------|-------|-------------|-------------|-----|-------------|-------------|
|                      | No.   | Mean ± SD   | 95% CI      | No.   | Mean ± SD   | 95% CI      | No. | Mean ± SD   | 95% CI      |
| 21                   | 4     | 7.8 ± 0.79  | 6.58–9.10   | 15    | 8.2 ± 1.35  | 7.46–8.96   |     |             |             |
| 22                   | 10    | 9.3 ± 0.96  | 8.57–9.94   | 10    | 9.2 ± 1.48  | 8.11–10.23  |     |             |             |
| 23                   | 8     | 8.8 ± 0.95  | 7.99–9.57   | 9     | 8.9 ± 1.43  | 7.82–10.02  |     |             |             |
| 24                   | 4     | 9.6 ± 0.82  | 8.34–10.94  | 8     | 9.9 ± 0.74  | 9.27–10.51  |     |             |             |
| 25                   | 16    | 11.0 ± 0.93 | 10.49–11.48 | 9     | 11.3 ± 1.54 | 10.10–12.48 |     |             |             |
| 26                   | 13    | 11.5 ± 1.59 | 10.52–12.44 | 11    | 11.0 ± 1.59 | 9.90–12.04  |     |             |             |
| 27                   | 16    | 11.4 ± 0.84 | 10.94–11.83 | 12    | 12.3 ± 1.64 | 11.21–13.29 | 5   | 9.6 ± 0.83  | 8.60–10.67  |
| 28                   | 18    | 12.4 ± 1.12 | 11.83–12.94 | 11    | 12.3 ± 1.86 | 11.07–13.57 | 10  | 10.2 ± 0.90 | 9.59–10.88  |
| 29                   | 12    | 12.6 ± 1.28 | 11.78–13.41 | 11    | 12.9 ± 0.91 | 12.24–13.47 | 13  | 11.3 ± 1.18 | 10.55–11.97 |
| 30                   | 21    | 13.2 ± 1.32 | 12.60–13.80 | 11    | 13.7 ± 1.72 | 12.57–14.88 | 16  | 11.9 ± 1.11 | 11.26–12.44 |
| 31                   | 22    | 14.2 ± 1.12 | 13.70–14.69 | 23    | 14.4 ± 2.12 | 13.52–15.35 | 26  | 12.3 ± 1.06 | 11.91–12.77 |
| 32                   | 12    | 14.0 ± 1.44 | 13.12–14.95 | 15    | 14.9 ± 2.02 | 13.74–15.98 | 27  | 13.0 ± 0.83 | 12.63–13.28 |
| 33                   | 14    | 15.3 ± 1.30 | 14.53–16.02 | 8     | 13.9 ± 2.49 | 11.83–16.00 | 16  | 13.3 ± 0.84 | 12.84–13.73 |
| 34                   | 10    | 15.7 ± 1.54 | 14.63–16.83 | 11    | 15.5 ± 2.29 | 14.00–17.08 | 15  | 13.6 ± 1.10 | 13.01–14.23 |
| 35                   | 13    | 15.9 ± 1.17 | 15.20–16.62 | 8     | 15.8 ± 2.52 | 13.70–17.92 | 23  | 14.8 ± 1.41 | 14.19–15.40 |

**On-line Table 3: Mean, SD, and CI for perimeter measurements**

| Gestational Age (wk) | US 2D |             |             | US 3D |             |             | MRI |             |             |
|----------------------|-------|-------------|-------------|-------|-------------|-------------|-----|-------------|-------------|
|                      | No.   | Mean ± SD   | 95% CI      | No.   | Mean ± SD   | 95% CI      | No. | Mean ± SD   | 95% CI      |
| 21                   | 4     | 40.7 ± 3.53 | 35.09–46.34 | 15    | 42.3 ± 4.49 | 39.84–44.81 |     |             |             |
| 22                   | 10    | 45.1 ± 4.29 | 42.05–48.18 | 10    | 46.4 ± 2.86 | 44.32–48.42 |     |             |             |
| 23                   | 8     | 45.4 ± 2.88 | 42.96–47.77 | 9     | 47.7 ± 4.22 | 44.48–50.96 |     |             |             |
| 24                   | 4     | 49.9 ± 1.93 | 46.84–53.00 | 8     | 49.8 ± 4.15 | 46.37–53.30 |     |             |             |
| 25                   | 16    | 53.1 ± 4.31 | 50.82–55.41 | 9     | 54.8 ± 4.76 | 51.12–58.44 |     |             |             |
| 26                   | 13    | 57.6 ± 4.33 | 54.95–60.19 | 11    | 58.9 ± 5.68 | 55.04–62.67 |     |             |             |
| 27                   | 16    | 59.1 ± 4.67 | 56.58–61.56 | 12    | 63.5 ± 4.83 | 60.43–66.56 | 5   | 52.0 ± 3.25 | 47.95–56.01 |
| 28                   | 18    | 60.5 ± 3.74 | 58.65–62.37 | 11    | 67.2 ± 8.40 | 61.50–72.79 | 10  | 53.4 ± 2.96 | 51.32–55.55 |
| 29                   | 12    | 64.5 ± 3.61 | 62.20–66.79 | 11    | 67.0 ± 5.42 | 63.37–70.65 | 13  | 56.1 ± 3.50 | 54.00–58.23 |
| 30                   | 21    | 65.3 ± 3.57 | 63.63–66.88 | 11    | 69.6 ± 6.66 | 65.08–74.03 | 16  | 62.9 ± 4.88 | 60.34–65.54 |
| 31                   | 22    | 66.3 ± 3.82 | 64.63–68.02 | 23    | 71.5 ± 6.41 | 68.69–74.24 | 26  | 66.3 ± 4.28 | 64.56–68.01 |
| 32                   | 12    | 67.7 ± 4.90 | 64.62–70.84 | 15    | 76.7 ± 9.79 | 71.25–82.10 | 27  | 67.7 ± 4.58 | 65.86–69.49 |
| 33                   | 14    | 71.3 ± 2.52 | 69.89–72.80 | 8     | 78.7 ± 3.27 | 76.01–81.47 | 16  | 70.8 ± 4.09 | 68.62–72.98 |
| 34                   | 10    | 74.4 ± 4.30 | 71.30–77.46 | 11    | 80.5 ± 8.58 | 74.70–86.23 | 15  | 73.1 ± 5.45 | 70.09–76.13 |
| 35                   | 13    | 75.0 ± 3.09 | 73.12–76.85 | 8     | 80.3 ± 9.60 | 72.26–88.32 | 23  | 77.0 ± 5.93 | 74.40–79.53 |

**On-line Table 4: Mean, SD, and CI for SA measurements**

| GA (wk) | US 2D |               |               | US 3D |               |               | MRI |               |               |
|---------|-------|---------------|---------------|-------|---------------|---------------|-----|---------------|---------------|
|         | No.   | Mean ± SD     | 95% CI        | No.   | Mean ± SD     | 95% CI        | No. | Mean ± SD     | 95% CI        |
| 21      | 4     | 98.4 ± 12.46  | 78.59–118.26  | 15    | 99.0 ± 17.38  | 89.37–108.63  |     |               |               |
| 22      | 10    | 115.0 ± 12.79 | 105.82–124.12 | 10    | 122.5 ± 17.01 | 110.33–134.67 |     |               |               |
| 23      | 8     | 124.3 ± 14.78 | 111.89–136.60 | 9     | 122.6 ± 21.52 | 106.02–139.10 |     |               |               |
| 24      | 4     | 140.4 ± 9.92  | 124.58–156.14 | 8     | 142.0 ± 20.92 | 124.51–159.49 |     |               |               |
| 25      | 16    | 171.7 ± 16.06 | 163.12–180.23 | 9     | 164.9 ± 29.64 | 142.11–187.67 |     |               |               |
| 26      | 13    | 192.1 ± 29.18 | 174.51–209.78 | 11    | 185.3 ± 22.08 | 170.44–200.11 |     |               |               |
| 27      | 16    | 199.4 ± 23.20 | 187.02–211.74 | 12    | 224.9 ± 26.14 | 208.31–241.53 | 5   | 141.2 ± 10.29 | 128.40–153.94 |
| 28      | 18    | 222.0 ± 27.07 | 208.56–235.49 | 11    | 237.4 ± 53.87 | 201.17–273.56 | 10  | 152.5 ± 15.17 | 141.61–163.32 |
| 29      | 12    | 250.4 ± 21.27 | 236.85–263.89 | 11    | 247.9 ± 38.21 | 222.24–273.58 | 13  | 175.1 ± 20.87 | 162.46–187.68 |
| 30      | 21    | 256.7 ± 22.05 | 246.70–266.78 | 11    | 277.1 ± 39.49 | 250.56–303.62 | 16  | 197.8 ± 24.66 | 184.70–210.98 |
| 31      | 22    | 273.6 ± 24.11 | 262.95–284.33 | 23    | 290.2 ± 43.78 | 271.24–309.10 | 26  | 214.5 ± 22.54 | 205.41–223.62 |
| 32      | 12    | 279.3 ± 24.93 | 263.44–295.12 | 15    | 311.8 ± 45.62 | 286.54–337.06 | 27  | 231.6 ± 24.45 | 221.90–241.25 |
| 33      | 14    | 319.3 ± 26.86 | 303.81–334.83 | 8     | 320.9 ± 31.83 | 294.26–347.49 | 16  | 243.7 ± 15.91 | 235.21–252.17 |
| 34      | 10    | 346.8 ± 35.43 | 321.42–372.10 | 11    | 348.8 ± 77.43 | 296.80–400.84 | 15  | 250.1 ± 23.53 | 237.02–263.09 |
| 35      | 13    | 352.0 ± 23.32 | 337.94–366.12 | 8     | 343.4 ± 66.15 | 288.07–398.68 | 23  | 283.8 ± 39.22 | 266.79–300.71 |

Note:—GA indicates gestational age.

**On-line Table 5: Bonferroni multiple comparison of estimated marginal means between 3 imaging modalities for SI and AP**

| Imaging Modality | SI              |       |                          | AP              |       |                          |
|------------------|-----------------|-------|--------------------------|-----------------|-------|--------------------------|
|                  | Mean Difference | P     | 95% CI of the Difference | Mean Difference | P     | 95% CI of the Difference |
| US 2D vs MRI     | 1.636           | <.001 | 1.259 to 2.012           | 1.589           | <.001 | 1.212 to 1.967           |
| US 2D vs US 3D   | −1.694          | <.001 | −2.042 to −1.345         | −0.186          | .601  | −0.535 to 0.163          |
| MRI vs US 3D     | −3.329          | <.001 | −3.727 to −2.932         | −1.776          | <.001 | −2.174 to −1.378         |

**On-line Table 6: Bonferroni multiple comparison between estimated marginal means between 3 imaging modalities for perimeter and SA**

| Imaging Modality | Perimeter       |       |                          | SA              |       |                          |
|------------------|-----------------|-------|--------------------------|-----------------|-------|--------------------------|
|                  | Mean Difference | P     | 95% CI of the Difference | Mean Difference | P     | 95% CI of the Difference |
| US 2D vs MRI     | 2.661           | <.001 | 1.238 to 4.085           | 66.408          | <.001 | 58.084 to 74.732         |
| US 2D vs US 3D   | −4.435          | <.001 | −5.751 to −3.119         | −10.984         | .002  | −18.677 to −3.290        |
| MRI vs US 3D     | −7.096          | <.001 | −8.597 to −5.595         | −77.392         | <.001 | −86.166 to −68.617       |
